# Supplementary material for: Simultaneous determination of As and Sb in soil using hydride generation capacitively coupled plasma microtorch optical emission spectrometry – comparison with inductively coupled plasma optical emission spectrometry
Source: Royal Society of Chemistry journal article supplement (doi:10.1039/c4ja00168k), 2014-07-11
Supplement: c4ja00168k1.pdf [file c4ja00168k1.pdf]

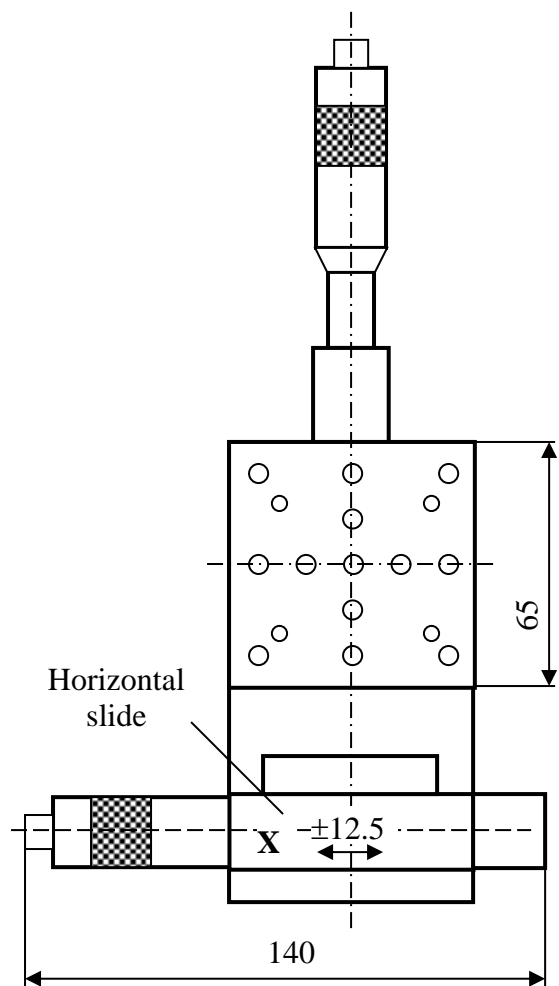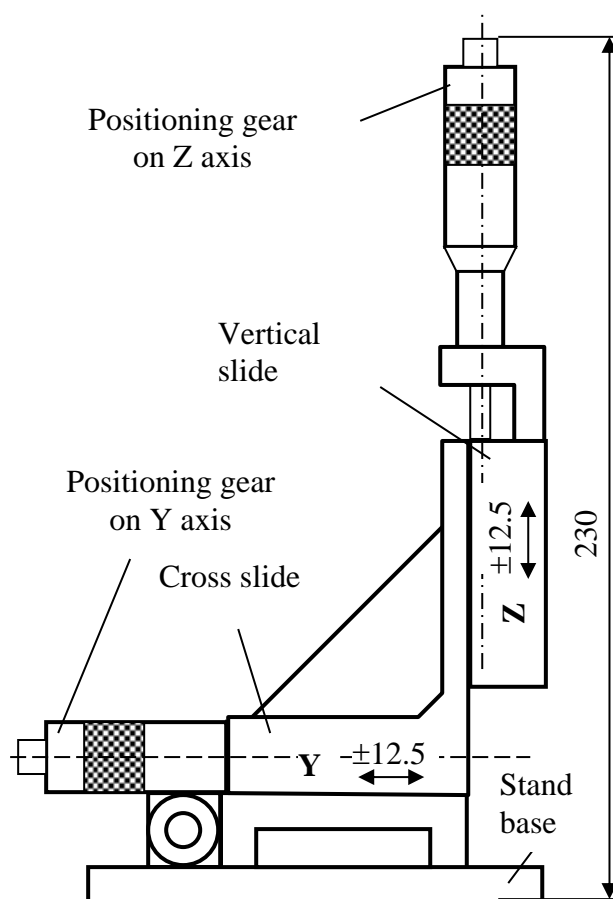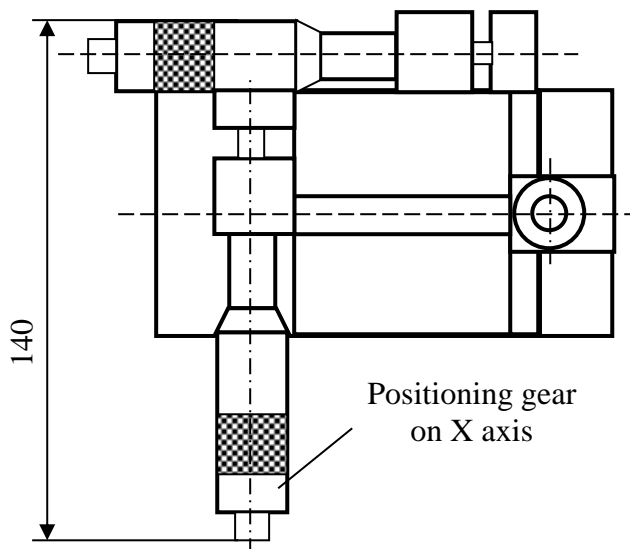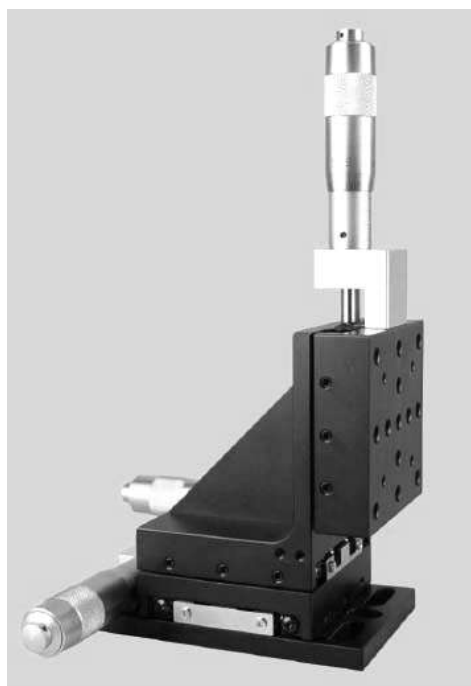

Characteristics:

Working stroke on XYZ axis:  $\pm 12.5$  mm (total: 25 mm)

Increment: 100  $\mu$ m

Precision: 5  $\mu$ m

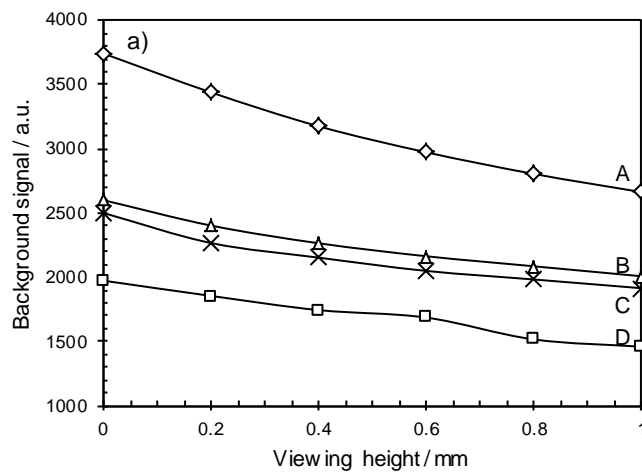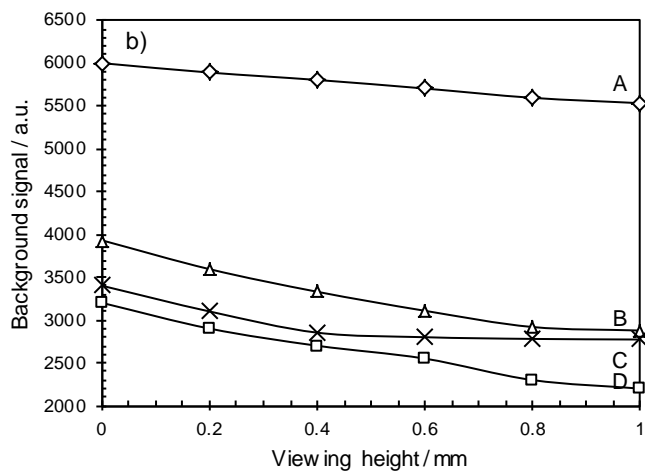

**Electronic Supplementary Information 2.** Background signal of Ar microplasma at 193.759 nm (a) and 217.581 nm (b) in HG- $\mu$ CCP-OES vs. observation height at argon flow rates (mL min<sup>-1</sup>). A – 100; B – 150; C – 200; D – 300. Plasma power 10 W.

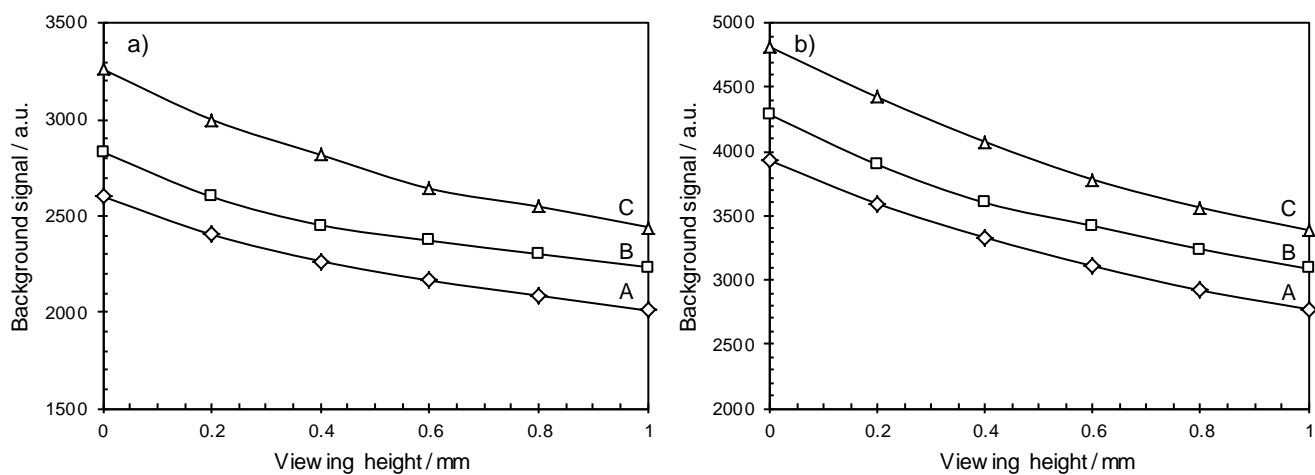

**Electronic Supplementary Information 3.** Background signal of Ar microplasma at 193.759 nm (a) and 217.581 nm (b) in HG- $\mu$ CCP-OES vs. observation height at different power levels (W). A – 10; B – 12; C – 15. Argon flow rate 150 mL min<sup>-1</sup>.
